# Supplementary material
Source: Research Square preprint supplement (doi:10.21203/rs.3.rs-9615533/v1)
Supplement: Supplementary file 1 [file 7736a88469145203231a32e7.pdf]

# **Supplementary Material**

**Age-specific predictors of in-hospital mortality in critically ill patients with atrial  
fibrillation: an interpretable machine-learning study**

## **Table of Contents**

- 1. Supplemental Figure 1. Page 2.**
- 2. Supplemental Figure 2. Page 3.**
- 3. Supplemental Figure 3. Page 4.**
- 4. Supplemental Table 1. Page 5-11.**
- 5. Supplemental Table 2. Page 12.**
- 6. Supplemental Table 3. Page 13.**
- 7. Supplemental Table 4. Page 14.**

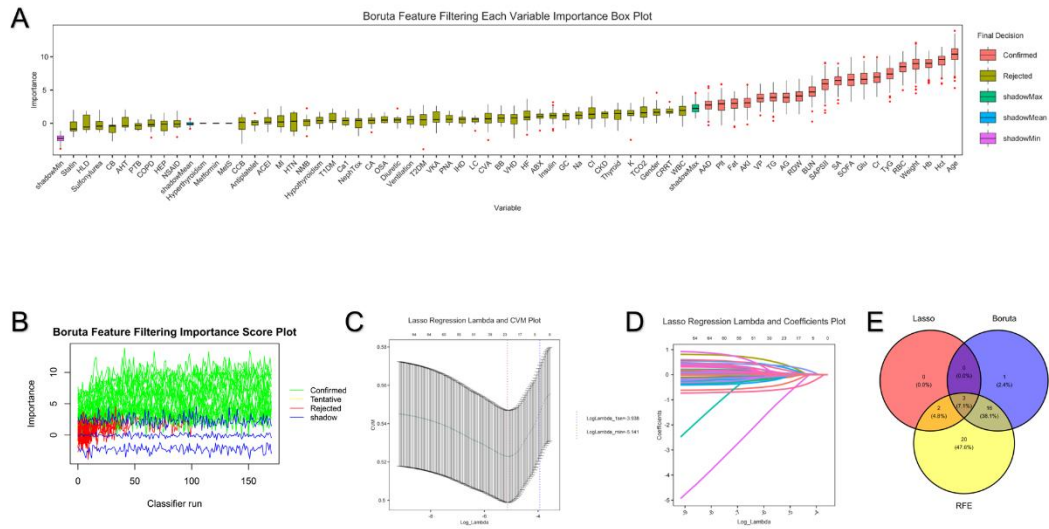

**Supplementary Figure S1. Feature selection using Boruta, LASSO, and recursive feature elimination in the overall cohort.**

(A) Boruta feature importance plot showing the importance of candidate variables for model prediction, with variables classified as confirmed, tentative, or rejected.

(B) Boruta importance plot across multiple iterations, illustrating the stability of selected variables.

(C) Ten-fold cross-validation curve for the least absolute shrinkage and selection operator (LASSO) model, showing the relationship between the regularization parameter ( $\log \lambda$ ) and the mean cross-validated error.

(D) LASSO coefficient profile showing the shrinkage of regression coefficients as the regularization parameter increased.

(E) Venn diagram showing the overlap among predictors selected by Boruta, LASSO, and recursive feature elimination (RFE).

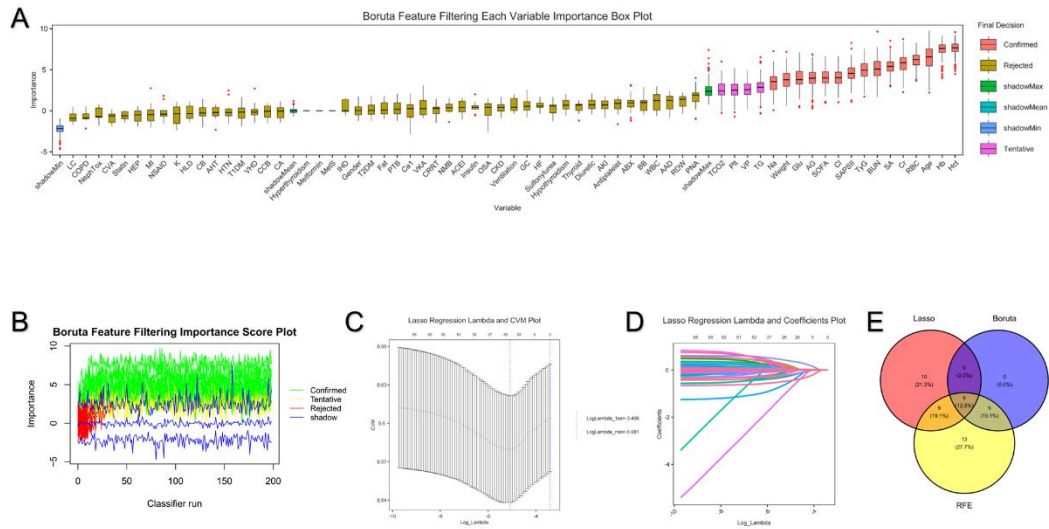

**Supplementary Figure S2. Feature selection using Boruta, LASSO, and recursive feature elimination in patients aged  $\geq 65$  years.**

(A) Boruta feature importance box plot showing the importance of candidate variables for model prediction, with variables classified as confirmed, tentative, or rejected according to the Boruta algorithm.

(B) Boruta importance score plot across repeated classifier runs, illustrating the stability of confirmed, tentative, rejected, and shadow features.

(C) Ten-fold cross-validation curve for the least absolute shrinkage and selection operator (LASSO) model, showing the relationship between the regularization parameter ( $\log \lambda$ ) and the mean cross-validated error.

(D) LASSO coefficient profile showing the shrinkage of regression coefficients as the regularization parameter increased.

(E) Venn diagram showing the overlap among predictors selected by Boruta, LASSO, and recursive feature elimination (RFE).

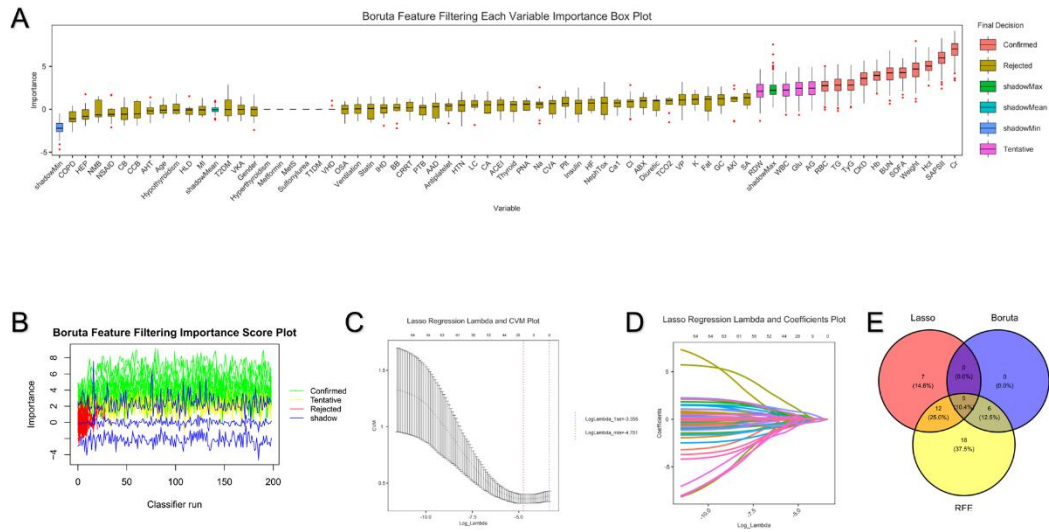

**Supplementary Figure S3. Feature selection using Boruta, LASSO, and recursive feature elimination in patients aged <65 years.**

(A) Boruta feature importance box plot showing the relative importance of candidate variables, with features classified as confirmed, tentative, or rejected.

(B) Boruta importance score plot across repeated classifier runs, demonstrating the stability of selected variables.

(C) Ten-fold cross-validation curve for the least absolute shrinkage and selection operator (LASSO) model, showing the relationship between the regularization parameter ( $\log \lambda$ ) and the mean cross-validated error.

(D) LASSO coefficient profile showing the shrinkage of regression coefficients with increasing regularization.

(E) Venn diagram showing the overlap among predictors selected by Boruta, LASSO, and recursive feature elimination (RFE).

**Supplementary Table S1. Baseline characteristics of the overall and age-stratified MIMIC-IV cohorts**

**Table 1A. Overall MIMIC-IV cohort**

| Section                      | Variable                                | Overall<br>(n=3449) | Training Cohort<br>(n=2414) | Internal Testing<br>Cohort(n=1035) | P value |
|------------------------------|-----------------------------------------|---------------------|-----------------------------|------------------------------------|---------|
| <b>General information</b>   |                                         |                     |                             |                                    |         |
|                              | Male sex                                | 2053 (59.52%)       | 1440 (59.60%)               | 613 (59.34%)                       | 0.910   |
|                              | Age, years                              | 74.00 (65.00–82.00) | 74.00 (65.00–82.00)         | 73.00 (65.00–81.00)                | 0.140   |
|                              | Weight, kg                              | 81.00 (67.90–98.10) | 80.70 (67.60–97.62)         | 82.00 (68.80–99.80)                | 0.219   |
| <b>Comorbidities</b>         |                                         |                     |                             |                                    |         |
|                              | Valvular Heart Disease                  | 81 (2.35%)          | 52 (2.15%)                  | 29 (2.81%)                         | 0.269   |
|                              | Hypertension                            | 1291 (37.43%)       | 906 (37.50%)                | 385 (37.27%)                       | 0.908   |
|                              | Cerebrovascular Accident                | 447 (12.96%)        | 313 (12.96%)                | 134 (12.97%)                       | 1.000   |
|                              | Heart Failure                           | 1635 (47.41%)       | 1153 (47.72%)               | 482 (46.66%)                       | 0.577   |
|                              | Myocardial Infarction                   | 488 (14.15%)        | 355 (14.69%)                | 133 (12.88%)                       | 0.166   |
|                              | Ischemic Heart Disease                  | 1524 (44.19%)       | 1077 (44.58%)               | 447 (43.27%)                       | 0.501   |
|                              | Hyperthyroidism                         | 10 (0.29%)          | 7 (0.29%)                   | 3 (0.29%)                          | 1.000   |
|                              | Hypothyroidism                          | 554 (16.06%)        | 378 (15.65%)                | 176 (17.04%)                       | 0.312   |
|                              | Metabolic Syndrome                      | 0 (0.00%)           | 0 (0.00%)                   | 0 (0.00%)                          | 1.000   |
|                              | Obesity                                 | 483 (14.00%)        | 329 (13.62%)                | 154 (14.91%)                       | 0.335   |
|                              | Type 2 Diabetes Mellitus                | 1174 (34.04%)       | 828 (34.27%)                | 346 (33.49%)                       | 0.666   |
|                              | Type 1 Diabetes Mellitus                | 29 (0.84%)          | 20 (0.83%)                  | 9 (0.87%)                          | 0.842   |
|                              | Hyperlipidemia                          | 1580 (45.81%)       | 1106 (45.78%)               | 474 (45.89%)                       | 0.970   |
|                              | Obstructive Sleep Apnea                 | 415 (12.03%)        | 281 (11.63%)                | 134 (12.97%)                       | 0.278   |
|                              | Chronic Bronchitis                      | 396 (11.48%)        | 282 (11.67%)                | 114 (11.04%)                       | 0.641   |
|                              | Chronic Obstructive Pulmonary Disease   | 586 (16.99%)        | 417 (17.26%)                | 169 (16.36%)                       | 0.553   |
|                              | Pneumonia                               | 1225 (35.52%)       | 852 (35.26%)                | 373 (36.11%)                       | 0.641   |
|                              | Pulmonary Tuberculosis                  | 77 (2.23%)          | 48 (1.99%)                  | 29 (2.81%)                         | 0.166   |
|                              | Acute Kidney Injury                     | 1823 (52.86%)       | 1286 (53.23%)               | 537 (51.98%)                       | 0.503   |
|                              | Chronic Kidney Disease                  | 959 (27.81%)        | 670 (27.73%)                | 289 (27.98%)                       | 0.901   |
|                              | Liver Cirrhosis                         | 251 (7.28%)         | 176 (7.28%)                 | 75 (7.26%)                         | 1.000   |
|                              | Hepatitis                               | 145 (4.20%)         | 99 (4.10%)                  | 46 (4.45%)                         | 0.644   |
|                              | Cancer                                  | 567 (16.44%)        | 405 (16.76%)                | 162 (15.68%)                       | 0.452   |
| <b>Treatment/ Medication</b> |                                         |                     |                             |                                    |         |
|                              | Antiarrhythmic agents                   | 927 (26.88%)        | 628 (25.99%)                | 299 (28.94%)                       | 0.078   |
|                              | Diuretics                               | 553 (16.03%)        | 400 (16.56%)                | 153 (14.81%)                       | 0.206   |
|                              | Calcium Channel Blocker                 | 432 (12.53%)        | 298 (12.33%)                | 134 (12.97%)                       | 0.613   |
|                              | Angiotensin-Converting Enzyme Inhibitor | 995 (28.85%)        | 701 (29.01%)                | 294 (28.46%)                       | 0.774   |
|                              | Beta Blocker                            | 2847 (82.55%)       | 1998 (82.70%)               | 849 (82.19%)                       | 0.732   |

**Table 1A (Continued)**

| Section                        | Variable                                 | Overall<br>(n=3449)       | Training Cohort<br>(n=2414) | Internal Testing<br>Cohort(n=1035) | P value |
|--------------------------------|------------------------------------------|---------------------------|-----------------------------|------------------------------------|---------|
|                                | Antiplatelet agents                      | 981 (28.44%)              | 695 (28.77%)                | 286 (27.69%)                       | 0.537   |
|                                | Vitamin K Antagonist                     | 914 (26.50%)              | 646 (26.74%)                | 268 (25.94%)                       | 0.643   |
|                                | Vasopressor                              | 2119 (61.44%)             | 1466 (60.68%)               | 653 (63.21%)                       | 0.169   |
|                                | Antihypertensive drugs                   | 2879 (83.47%)             | 2024 (83.77%)               | 855 (82.77%)                       | 0.484   |
|                                | Insulin                                  | 2442 (70.80%)             | 1713 (70.90%)               | 729 (70.57%)                       | 0.870   |
|                                | Sulfonylureas                            | 134 (3.89%)               | 88 (3.64%)                  | 46 (4.45%)                         | 0.290   |
|                                | Metformin                                | 0 (0.00%)                 | 0 (0.00%)                   | 0 (0.00%)                          | 1.000   |
|                                | Statins                                  | 686 (19.89%)              | 461 (19.08%)                | 225 (21.78%)                       | 0.070   |
|                                | Nonsteroidal Anti-Inflammatory<br>Drug   | 112 (3.25%)               | 82 (3.39%)                  | 30 (2.90%)                         | 0.529   |
|                                | Thyroid medication                       | 224 (6.49%)               | 149 (6.17%)                 | 75 (7.26%)                         | 0.229   |
|                                | Neuromuscular Blocker                    | 251 (7.28%)               | 177 (7.33%)                 | 74 (7.16%)                         | 0.886   |
|                                | Sedative and analgesic agents            | 2255 (65.38%)             | 1578 (65.31%)               | 677 (65.54%)                       | 0.907   |
|                                | Nephrotoxic drugs                        | 3002 (87.04%)             | 2105 (87.13%)               | 897 (86.83%)                       | 0.825   |
|                                | Glucocorticoids                          | 1056 (30.62%)             | 724 (29.97%)                | 332 (32.14%)                       | 0.211   |
|                                | Antibiotics                              | 2899 (84.05%)             | 2031 (84.06%)               | 868 (84.03%)                       | 1.000   |
|                                | Continuous Renal Replacement<br>Therapy  | 437 (12.67%)              | 303 (12.54%)                | 134 (12.97%)                       | 0.738   |
|                                | Mechanical Ventilation                   | 2854 (82.75%)             | 1997 (82.66%)               | 857 (82.96%)                       | 0.844   |
| <b>ICU physiological score</b> |                                          |                           |                             |                                    |         |
|                                | Sequential Organ Failure<br>Assessment   | 5.00 (3.00–8.00)          | 5.00 (3.00–8.00)            | 5.00 (3.00–8.00)                   | 0.836   |
|                                | Simplified Acute Physiology<br>Score II  | 40.00 (32.00–50.00)       | 41.00 (32.00–50.00)         | 40.00 (32.00–50.00)                | 0.208   |
| <b>Laboratory Indicators</b>   |                                          |                           |                             |                                    |         |
|                                | Hematocrit, %                            | 33.20 (28.30–38.30)       | 33.20 (28.37–38.32)         | 33.00 (28.10–38.20)                | 0.601   |
|                                | Hemoglobin, g/dL                         | 10.70 (9.10–12.50)        | 10.80 (9.10–12.50)          | 10.70 (9.00–12.40)                 | 0.533   |
|                                | Red cell distribution width, %           | 14.80 (13.70–16.60)       | 14.70 (13.70–16.60)         | 14.80 (13.80–16.40)                | 0.800   |
|                                | Red blood cell count, $\times 10^{12}/L$ | 3.60 (3.10–4.20)          | 3.60 (3.10–4.20)            | 3.60 (3.10–4.20)                   | 0.518   |
|                                | White blood cell count, $\times 10^9/L$  | 11.00 (8.10–15.80)        | 10.90 (8.10–15.80)          | 11.00 (7.90–15.70)                 | 0.798   |
|                                | Platelet count, $\times 10^9/L$          | 193.00<br>(139.00–263.00) | 193.00<br>(139.00–264.00)   | 194.00<br>(139.00–262.00)          | 0.913   |
|                                | Anion gap, mmol/L                        | 14.00 (12.00–17.00)       | 14.00 (12.00–17.00)         | 14.00 (12.00–17.00)                | 0.852   |
|                                | Calcium, mg/dL                           | 8.40 (7.90–8.90)          | 8.40 (7.90–8.90)            | 8.40 (7.90–8.90)                   | 0.831   |
|                                | Chloride, mmol/L                         | 103.00 (99.00–107.00)     | 103.00 (99.00–107.00)       | 103.00 (99.00–107.00)              | 0.157   |
|                                | Potassium, mmol/L                        | 4.20 (3.80–4.60)          | 4.20 (3.80–4.70)            | 4.10 (3.70–4.60)                   | 0.161   |

**Table 1A (Continued)**

| Section | Variable                     | Overall<br>(n=3449)       | Training Cohort<br>(n=2414) | Internal Testing<br>Cohort(n=1035) | P value |
|---------|------------------------------|---------------------------|-----------------------------|------------------------------------|---------|
|         |                              | 138.00<br>(135.00–141.00) | 138.00<br>(135.00–141.00)   | 139.00<br>(135.00–142.00)          | 0.439   |
|         | Sodium, mmol/L               |                           |                             |                                    |         |
|         | Creatinine, mg/dL            | 1.10 (0.80–1.80)          | 1.10 (0.80–1.80)            | 1.10 (0.80–1.80)                   | 0.490   |
|         | Blood urea nitrogen, mg/dL   | 24.00 (16.00–41.00)       | 24.00 (16.00–41.00)         | 24.00 (16.00–41.00)                | 0.721   |
|         | Total carbon dioxide, mmol/L | 25.00 (21.00–28.00)       | 25.00 (21.00–28.00)         | 25.00 (22.00–28.00)                | 0.475   |
|         | Triglycerides, mg/dL         | 117.00 (81.00–176.00)     | 117.00 (80.00–177.00)       | 116.00 (82.00–175.00)              | 0.823   |
|         | Glucose, mmol/L              | 7.30 (5.90–9.60)          | 7.30 (5.90–9.50)            | 7.40 (6.10–9.60)                   | 0.489   |

**Table 1B. Patients aged ≥65 years**

| Section                    | Variable                              | Overall<br>(n=2635) | Training Cohort<br>(n=1844) | Internal Testing<br>Cohort(n=791) | P value |
|----------------------------|---------------------------------------|---------------------|-----------------------------|-----------------------------------|---------|
| <b>General information</b> |                                       |                     |                             |                                   |         |
|                            | Male sex                              | 1465 (55.60%)       | 1043 (56.53%)               | 422 (53.42%)                      | 0.146   |
|                            | Age, years                            | 78.00 (71.00–84.00) | 78.00 (71.00–84.00)         | 78.00 (71.25–85.00)               | 0.261   |
|                            | Weight, kg                            | 78.70 (66.25–94.10) | 79.10 (66.50–94.40)         | 77.65 (65.35–93.57)               | 0.112   |
| <b>Comorbidities</b>       |                                       |                     |                             |                                   |         |
|                            | Valvular Heart Disease                | 53 (2.01%)          | 34 (1.84%)                  | 19 (2.41%)                        | 0.364   |
|                            | Hypertension                          | 1040 (39.47%)       | 710 (38.48%)                | 330 (41.77%)                      | 0.117   |
|                            | Cerebrovascular Accident              | 392 (14.88%)        | 273 (14.80%)                | 119 (15.06%)                      | 0.858   |
|                            | Heart Failure                         | 1279 (48.54%)       | 899 (48.73%)                | 380 (48.10%)                      | 0.799   |
|                            | Myocardial Infarction                 | 381 (14.46%)        | 260 (14.09%)                | 121 (15.32%)                      | 0.432   |
|                            | Ischemic Heart Disease                | 1220 (46.30%)       | 868 (47.05%)                | 352 (44.56%)                      | 0.250   |
|                            | Hyperthyroidism                       | 9 (0.34%)           | 5 (0.27%)                   | 4 (0.51%)                         | 0.466   |
|                            | Hypothyroidism                        | 464 (17.61%)        | 308 (16.69%)                | 156 (19.75%)                      | 0.065   |
|                            | Metabolic Syndrome                    | 0 (0.00%)           | 0 (0.00%)                   | 0 (0.00%)                         | 1.000   |
|                            | Obesity                               | 303 (11.50%)        | 214 (11.60%)                | 89 (11.27%)                       | 0.842   |
|                            | Type 2 Diabetes Mellitus              | 913 (34.65%)        | 653 (35.39%)                | 260 (32.91%)                      | 0.228   |
|                            | Type 1 Diabetes Mellitus              | 11 (0.42%)          | 8 (0.43%)                   | 3 (0.38%)                         | 1.000   |
|                            | Hyperlipidemia                        | 1304 (49.49%)       | 903 (48.94%)                | 401 (50.76%)                      | 0.395   |
|                            | Obstructive Sleep Apnea               | 288 (10.93%)        | 193 (10.46%)                | 95 (12.03%)                       | 0.247   |
|                            | Chronic Bronchitis                    | 324 (12.30%)        | 243 (13.17%)                | 81 (10.25%)                       | 0.038   |
|                            | Chronic Obstructive Pulmonary Disease | 479 (18.18%)        | 356 (19.30%)                | 123 (15.57%)                      | 0.024   |
|                            | Pneumonia                             | 930 (35.29%)        | 664 (35.99%)                | 266 (33.67%)                      | 0.266   |
|                            | Pulmonary Tuberculosis                | 57 (2.16%)          | 38 (2.06%)                  | 19 (2.41%)                        | 0.562   |
|                            | Acute Kidney Injury                   | 1376 (52.22%)       | 978 (53.01%)                | 398 (50.38%)                      | 0.217   |
|                            | Chronic Kidney Disease                | 801 (30.40%)        | 563 (30.51%)                | 238 (30.13%)                      | 0.853   |

**Table 1B (Continued)**

| Section | Variable | Overall | Training Cohort | Internal Testing | P value |
|---------|----------|---------|-----------------|------------------|---------|
|---------|----------|---------|-----------------|------------------|---------|

|                                            | (n=2635)              | (n=1844)              | Cohort(n=791)         |       |
|--------------------------------------------|-----------------------|-----------------------|-----------------------|-------|
| Liver Cirrhosis                            | 138 (5.24%)           | 98 (5.31%)            | 40 (5.06%)            | 0.849 |
| Hepatitis                                  | 71 (2.69%)            | 51 (2.76%)            | 20 (2.53%)            | 0.794 |
| Cancer                                     | 503 (19.09%)          | 342 (18.54%)          | 161 (20.38%)          | 0.279 |
| <b>Treatment/<br/>Medication</b>           |                       |                       |                       |       |
| Antiarrhythmic agents                      | 639 (24.25%)          | 457 (24.77%)          | 182 (23.04%)          | 0.347 |
| Diuretics                                  | 450 (17.08%)          | 317 (17.18%)          | 133 (16.84%)          | 0.865 |
| Calcium Channel Blocker                    | 331 (12.56%)          | 235 (12.74%)          | 96 (12.15%)           | 0.701 |
| Angiotensin-Converting<br>Enzyme Inhibitor | 749 (28.43%)          | 510 (27.64%)          | 239 (30.25%)          | 0.187 |
| Beta Blocker                               | 2183 (82.85%)         | 1535 (83.20%)         | 648 (82.03%)          | 0.464 |
| Antiplatelet agents                        | 759 (28.80%)          | 555 (30.08%)          | 204 (25.82%)          | 0.027 |
| Vitamin K Antagonist                       | 702 (26.64%)          | 498 (26.99%)          | 204 (25.82%)          | 0.564 |
| Vasopressor                                | 1533 (58.18%)         | 1078 (58.43%)         | 455 (57.59%)          | 0.698 |
| Antihypertensive drugs                     | 2197 (83.38%)         | 1532 (83.04%)         | 665 (84.18%)          | 0.493 |
| Insulin                                    | 1875 (71.16%)         | 1307 (70.84%)         | 568 (71.90%)          | 0.606 |
| Sulfonylureas                              | 101 (3.83%)           | 67 (3.63%)            | 34 (4.30%)            | 0.438 |
| Metformin                                  | 0 (0.00%)             | 0 (0.00%)             | 0 (0.00%)             | 1.000 |
| Statins                                    | 572 (21.71%)          | 406 (22.01%)          | 166 (21.01%)          | 0.606 |
| Nonsteroidal Anti-Inflammatory<br>Drug     | 67 (2.54%)            | 45 (2.44%)            | 22 (2.78%)            | 0.591 |
| Thyroid medication                         | 184 (6.98%)           | 127 (6.88%)           | 57 (7.22%)            | 0.740 |
| Neuromuscular Blocker                      | 159 (6.03%)           | 121 (6.56%)           | 38 (4.81%)            | 0.090 |
| Sedative and analgesic agents              | 1630 (61.86%)         | 1147 (62.17%)         | 483 (61.14%)          | 0.630 |
| Nephrotoxic drugs                          | 2281 (86.57%)         | 1598 (86.61%)         | 683 (86.46%)          | 0.901 |
| Glucocorticoids                            | 769 (29.18%)          | 550 (29.81%)          | 219 (27.72%)          | 0.283 |
| Antibiotics                                | 2171 (82.39%)         | 1532 (83.04%)         | 639 (80.89%)          | 0.199 |
| Continuous Renal Replacement<br>Therapy    | 280 (10.63%)          | 206 (11.17%)          | 74 (9.37%)            | 0.190 |
| Mechanical Ventilation                     | 2165 (82.16%)         | 1537 (83.31%)         | 628 (79.49%)          | 0.023 |
| <b>ICU physiological<br/>score</b>         |                       |                       |                       |       |
| Sequential Organ Failure<br>Assessment     | 5.00 (3.00–8.00)      | 5.00 (3.00–8.00)      | 5.00 (3.00–8.00)      | 0.836 |
| Simplified Acute Physiology<br>Score II    | 40.00 (32.00–50.00)   | 41.00 (32.00–50.00)   | 40.00 (32.00–50.00)   | 0.208 |
| <b>Laboratory<br/>Indicators</b>           |                       |                       |                       |       |
| Hematocrit, %                              | 33.20 (28.40 – 38.05) | 33.20 (28.40 – 37.80) | 33.10 (28.50 – 38.48) | 0.894 |
| Hemoglobin, g/dL                           | 10.70 (9.10 – 12.40)  | 10.70 (9.10 – 12.40)  | 10.70 (9.20 – 12.40)  | 0.644 |

**Table 1B (Continued)**

| Section | Variable                                    | Overall<br>(n=2635)      | Training Cohort<br>(n=1844) | Internal Testing<br>Cohort(n=791) | P value |
|---------|---------------------------------------------|--------------------------|-----------------------------|-----------------------------------|---------|
|         | Red cell distribution width, %              | 14.80 (13.70 - 16.40)    | 14.80 (13.80 - 16.40)       | 14.70 (13.60 - 16.40)             | 0.364   |
|         | Red blood cell count, ×10 <sup>12</sup> /L  | 3.60 (3.10 - 4.20)       | 3.60 (3.10 - 4.20)          | 3.60 (3.10 - 4.20)                | 0.796   |
|         | White blood cell count, ×10 <sup>9</sup> /L | 10.90 (8.10 - 15.40)     | 10.90 (8.00 - 15.40)        | 11.00 (8.20 - 15.10)              | 0.785   |
|         | Platelet count, ×10 <sup>9</sup> /L         | 196.00 (143.00 - 264.00) | 194.00 (141.00 - 260.00)    | 199.50 (147.25 - 271.75)          | 0.166   |
|         | Anion gap, mmol/L                           | 14.00 (12.00 - 17.00)    | 15.00 (12.00 - 17.00)       | 14.00 (12.00 - 16.00)             | 0.047   |
|         | Calcium, mg/dL                              | 8.40 (7.90 - 8.90)       | 8.40 (7.90 - 8.90)          | 8.40 (7.90 - 8.90)                | 0.632   |
|         | Chloride, mmol/L                            | 103.00 (99.00 - 107.00)  | 103.00 (99.00 - 107.00)     | 103.00 (100.00 - 107.00)          | 0.948   |
|         | Potassium, mmol/L                           | 4.10 (3.80 - 4.60)       | 4.10 (3.70 - 4.60)          | 4.20 (3.80 - 4.60)                | 0.894   |
|         | Sodium, mmol/L                              | 139.00 (136.00 - 141.00) | 139.00 (136.00 - 141.00)    | 138.00 (135.00 - 141.00)          | 0.443   |
|         | Creatinine, mg/dL                           | 1.10 (0.80 - 1.70)       | 1.20 (0.80 - 1.80)          | 1.10 (0.80 - 1.70)                | 0.176   |
|         | Blood urea nitrogen, mg/dL                  | 25.00 (17.00 - 41.00)    | 26.00 (18.00 - 43.00)       | 24.00 (16.00 - 37.75)             | 0.009   |
|         | Total carbon dioxide, mmol/L                | 25.00 (22.00 - 28.00)    | 25.00 (22.00 - 28.00)       | 25.00 (22.00 - 28.00)             | 0.798   |
|         | Triglycerides, mg/dL                        | 112.00 (79.00 - 166.00)  | 111.00 (79.00 - 164.00)     | 114.00 (79.00 - 169.00)           | 0.515   |
|         | Glucose, mmol/L                             | 166.00 (79.00 - 166.00)  | 164.00 (79.00 - 164.00)     | 169.00 (79.00 - 169.00)           | 0.027   |

**Table 1C. Patients aged <65 years**

| Section                    | Variable                 | Overall<br>(n=814)   | Training Cohort<br>(n=570) | Internal Testing<br>Cohort(n=244) | P value |
|----------------------------|--------------------------|----------------------|----------------------------|-----------------------------------|---------|
| <b>General information</b> |                          |                      |                            |                                   |         |
|                            | Male sex                 | 588 (72.24%)         | 410 (71.80%)               | 178 (73.25%)                      | 0.732   |
|                            | Age, years               | 58.00 (53.00-62.00)  | 58.00 (53.00-62.00)        | 58.00 (52.00-62.00)               | 0.930   |
|                            | Weight, kg               | 91.90 (75.00-111.00) | 93.00 (76.00-112.50)       | 87.90 (73.60-109.70)              | 0.093   |
| <b>Comorbidities</b>       |                          |                      |                            |                                   |         |
|                            | Valvular Heart Disease   | 28 (3.44%)           | 20 (3.50%)                 | 8 (3.29%)                         | 1.000   |
|                            | Hypertension             | 251 (30.84%)         | 184 (32.22%)               | 67 (27.57%)                       | 0.214   |
|                            | Cerebrovascular Accident | 55 (6.76%)           | 39 (6.83%)                 | 16 (6.58%)                        | 1.000   |
|                            | Heart Failure            | 356 (43.73%)         | 237 (41.51%)               | 119 (48.97%)                      | 0.054   |
|                            | Myocardial Infarction    | 107 (13.14%)         | 79 (13.84%)                | 28 (11.52%)                       | 0.428   |
|                            | Ischemic Heart Disease   | 304 (37.35%)         | 204 (35.73%)               | 100 (41.15%)                      | 0.154   |
|                            | Hyperthyroidism          | 1 (0.12%)            | 1 (0.18%)                  | 0 (0.00%)                         | 1.000   |
|                            | Hypothyroidism           | 90 (11.06%)          | 71 (12.43%)                | 19 (7.82%)                        | 0.066   |
|                            | Metabolic Syndrome       | 0 (0.00%)            | 0 (0.00%)                  | 0 (0.00%)                         | 1.000   |
|                            | Obesity                  | 180 (22.11%)         | 131 (22.94%)               | 49 (20.16%)                       | 0.407   |

**Table 1C (Continued)**

| Section                          | Variable                                   | Overall<br>(n=814) | Training Cohort<br>(n=570) | Internal Testing<br>Cohort(n=244) | P value |
|----------------------------------|--------------------------------------------|--------------------|----------------------------|-----------------------------------|---------|
|                                  | Type 2 Diabetes Mellitus                   | 261 (32.06%)       | 175 (30.65%)               | 86 (35.39%)                       | 0.190   |
|                                  | Type 1 Diabetes Mellitus                   | 18 (2.21%)         | 16 (2.80%)                 | 2 (0.82%)                         | 0.115   |
|                                  | Hyperlipidemia                             | 276 (33.91%)       | 194 (33.98%)               | 82 (33.74%)                       | 1.000   |
|                                  | Obstructive Sleep Apnea                    | 127 (15.60%)       | 93 (16.29%)                | 34 (13.99%)                       | 0.460   |
|                                  | Chronic Bronchitis                         | 72 (8.85%)         | 46 (8.06%)                 | 26 (10.70%)                       | 0.227   |
|                                  | Chronic Obstructive Pulmonary<br>Disease   | 107 (13.14%)       | 73 (12.78%)                | 34 (13.99%)                       | 0.651   |
|                                  | Pneumonia                                  | 295 (36.24%)       | 212 (37.13%)               | 83 (34.16%)                       | 0.427   |
|                                  | Pulmonary Tuberculosis                     | 20 (2.46%)         | 18 (3.15%)                 | 2 (0.82%)                         | 0.050   |
|                                  | Acute Kidney Injury                        | 447 (54.91%)       | 320 (56.04%)               | 127 (52.26%)                      | 0.356   |
|                                  | Chronic Kidney Disease                     | 158 (19.41%)       | 114 (19.96%)               | 44 (18.11%)                       | 0.563   |
|                                  | Liver Cirrhosis                            | 113 (13.88%)       | 86 (15.06%)                | 27 (11.11%)                       | 0.150   |
|                                  | Hepatitis                                  | 74 (9.09%)         | 55 (9.63%)                 | 19 (7.82%)                        | 0.505   |
|                                  | Cancer                                     | 64 (7.86%)         | 45 (7.88%)                 | 19 (7.82%)                        | 1.000   |
| <b>Treatment/<br/>Medication</b> |                                            |                    |                            |                                   |         |
|                                  | Antiarrhythmic agents                      | 288 (35.38%)       | 204 (35.73%)               | 84 (34.57%)                       | 0.810   |
|                                  | Diuretics                                  | 103 (12.65%)       | 72 (12.61%)                | 31 (12.76%)                       | 1.000   |
|                                  | Calcium Channel Blocker                    | 101 (12.41%)       | 69 (12.08%)                | 32 (13.17%)                       | 0.728   |
|                                  | Angiotensin-Converting<br>Enzyme Inhibitor | 246 (30.22%)       | 185 (32.40%)               | 61 (25.10%)                       | 0.045   |
|                                  | Beta Blocker                               | 664 (81.57%)       | 467 (81.79%)               | 197 (81.07%)                      | 0.844   |
|                                  | Antiplatelet agents                        | 222 (27.27%)       | 165 (28.90%)               | 57 (23.46%)                       | 0.122   |
|                                  | Vitamin K Antagonist                       | 212 (26.04%)       | 150 (26.27%)               | 62 (25.51%)                       | 0.862   |
|                                  | Vasopressor                                | 586 (71.99%)       | 401 (70.23%)               | 185 (76.13%)                      | 0.089   |
|                                  | Antihypertensive drugs                     | 682 (83.78%)       | 479 (83.89%)               | 203 (83.54%)                      | 0.917   |
|                                  | Insulin                                    | 567 (69.66%)       | 387 (67.78%)               | 180 (74.07%)                      | 0.080   |
|                                  | Sulfonylureas                              | 33 (4.05%)         | 24 (4.20%)                 | 9 (3.70%)                         | 0.847   |
|                                  | Metformin                                  | 0 (0.00%)          | 0 (0.00%)                  | 0 (0.00%)                         | 1.000   |
|                                  | Statins                                    | 114 (14.00%)       | 76 (13.31%)                | 38 (15.64%)                       | 0.379   |
|                                  | Nonsteroidal Anti-Inflammatory<br>Drug     | 45 (5.53%)         | 34 (5.95%)                 | 11 (4.53%)                        | 0.504   |
|                                  | Thyroid medication                         | 40 (4.91%)         | 29 (5.08%)                 | 11 (4.53%)                        | 0.860   |
|                                  | Neuromuscular Blocker                      | 92 (11.30%)        | 69 (12.08%)                | 23 (9.47%)                        | 0.333   |
|                                  | Sedative and analgesic agents              | 625 (76.78%)       | 431 (75.48%)               | 194 (79.84%)                      | 0.204   |
|                                  | Nephrotoxic drugs                          | 721 (88.57%)       | 506 (88.62%)               | 215 (88.48%)                      | 1.000   |
|                                  | Glucocorticoids                            | 287 (35.26%)       | 200 (35.03%)               | 87 (35.80%)                       | 0.873   |
|                                  | Antibiotics                                | 728 (89.43%)       | 510 (89.32%)               | 218 (89.71%)                      | 0.902   |
|                                  | Continuous Renal Replacement<br>Therapy    | 157 (19.29%)       | 105 (18.39%)               | 52 (21.40%)                       | 0.332   |

**Table 1C (Continued)**

| Section                        | Variable                                    | Overall<br>(n=814)     | Training Cohort<br>(n=570) | Internal Testing<br>Cohort(n=244) | P value |
|--------------------------------|---------------------------------------------|------------------------|----------------------------|-----------------------------------|---------|
| <b>ICU physiological score</b> | Mechanical Ventilation                      | 689 (84.64%)           | 478 (83.71%)               | 211 (86.83%)                      | 0.289   |
|                                | Sequential Organ Failure Assessment         | 6.00 (3.00–10.00)      | 6.00 (3.00–9.00)           | 6.00 (3.00–10.00)                 | 0.211   |
|                                | Simplified Acute Physiology Score II        | 35.00 (27.00–47.00)    | 36.00 (27.00–47.00)        | 35.00 (27.00–47.00)               | 0.842   |
| <b>Laboratory Indicators</b>   | Hematocrit, %                               | 33.20 (27.50–38.77)    | 33.40 (27.85–38.85)        | 32.80 (26.95–38.70)               | 0.262   |
|                                | Hemoglobin, g/dL                            | 10.70 (8.90–12.78)     | 10.80 (9.15–12.80)         | 10.50 (8.60–12.65)                | 0.192   |
|                                | Red cell distribution width, %              | 14.80 (13.70–17.00)    | 14.80 (13.60–17.00)        | 14.70 (13.80–17.00)               | 0.703   |
|                                | Red blood cell count, ×10 <sup>12</sup> /L  | 3.70 (3.00–4.30)       | 3.70 (3.10–4.30)           | 3.60 (3.00–4.30)                  | 0.412   |
|                                | White blood cell count, ×10 <sup>9</sup> /L | 11.15 (7.90–17.00)     | 11.10 (7.80–17.40)         | 11.20 (8.05–16.50)                | 0.652   |
|                                | Platelet count, ×10 <sup>9</sup> /L         | 186.00 (120.00–260.75) | 188.00 (123.50–266.00)     | 177.00 (115.00–253.50)            | 0.202   |
|                                | Anion gap, mmol/L                           | 15.00 (12.00–18.00)    | 15.00 (12.00–17.00)        | 15.00 (11.00–18.00)               | 0.725   |
|                                | Calcium, mg/dL                              | 8.30 (7.80–8.80)       | 8.30 (7.80–8.80)           | 8.30 (7.80–8.90)                  | 0.985   |
|                                | Chloride, mmol/L                            | 102.00 (97.25–106.00)  | 102.00 (98.00–106.00)      | 102.00 (97.00–106.50)             | 0.885   |
|                                | Potassium, mmol/L                           | 4.20 (3.80–4.70)       | 4.20 (3.80–4.70)           | 4.10 (3.70–4.60)                  | 0.329   |
|                                | Sodium, mmol/L                              | 137.00 (134.00–141.00) | 137.00 (133.00–141.00)     | 138.00 (134.00–141.00)            | 0.267   |
|                                | Creatinine, mg/dL                           | 1.15 (0.80–2.10)       | 1.10 (0.80–2.10)           | 1.20 (0.80–2.10)                  | 0.865   |
|                                | Blood urea nitrogen, mg/dL                  | 22.00 (14.00–40.00)    | 22.00 (14.00–40.00)        | 22.00 (14.00–39.50)               | 0.944   |
|                                | Total carbon dioxide, mmol/L                | 24.00 (21.00–28.00)    | 24.00 (21.00–28.00)        | 26.00 (22.00–28.00)               | 0.004   |
|                                | Triglycerides, mg/dL                        | 135.00 (90.00–219.50)  | 134.00 (90.00–223.50)      | 142.00 (90.00–211.00)             | 0.568   |
|                                | Glucose, mmol/L                             | 7.30 (5.90–9.97)       | 7.20 (6.00–10.20)          | 7.30 (5.90–9.80)                  | 0.900   |

Continuous variables are presented as median (interquartile range), and categorical variables are presented as n (%). P values compare the training and internal testing cohorts within the overall cohort and each age subgroup. Continuous variables were analyzed using the two-sided Wilcoxon rank-sum test, and categorical variables were analyzed using the two-sided Fisher's exact test for 2 × 2 tables. For categorical variables, n denotes the number of positive cases.

**Abbreviations:** MIMIC-IV, Medical Information Mart for Intensive Care IV.

**Supplementary Table S2. Performance of the nine machine learning models in the external validation cohort of the overall study population**

| Model               | AUC   | Threshold | Accuracy | Sensitivity | Specificity | Precision | F1 score |
|---------------------|-------|-----------|----------|-------------|-------------|-----------|----------|
| Logistic regression | 0.655 | 0.560     | 0.745    | 0.469       | 0.759       | 0.089     | 0.149    |
| SVM                 | 0.650 | 0.498     | 0.467    | 0.786       | 0.451       | 0.067     | 0.123    |
| GBM                 | 0.644 | 0.564     | 0.731    | 0.490       | 0.743       | 0.087     | 0.148    |
| Neural network      | 0.633 | 0.530     | 0.550    | 0.694       | 0.543       | 0.071     | 0.128    |
| KNN                 | 0.557 | 0.500     | 0.636    | 0.469       | 0.645       | 0.062     | 0.110    |
| XGBoost             | 0.659 | 0.500     | 0.627    | 0.633       | 0.627       | 0.078     | 0.139    |
| AdaBoost            | 0.618 | 0.500     | 0.722    | 0.449       | 0.736       | 0.078     | 0.133    |
| LightGBM            | 0.588 | 0.328     | 0.564    | 0.612       | 0.562       | 0.065     | 0.118    |
| CatBoost            | 0.693 | 0.620     | 0.553    | 0.755       | 0.543       | 0.076     | 0.139    |

Nine machine learning models were evaluated using the final predictors selected in the overall cohort, including age, body weight, and red cell distribution width. Model performance was assessed in the external validation cohort from MIMIC-III. The classification threshold for each model represents the probability cutoff used to calculate threshold-dependent metrics. AUC is threshold-independent; accuracy, sensitivity, specificity, precision, and F1 score are threshold-dependent metrics.

**Abbreviations:** AUC, area under the receiver operating characteristic curve; F1, F1 score; GBM, gradient boosting machine; KNN, k-nearest neighbors; ML, machine learning; RDW, red cell distribution width; SVM, support vector machine.

**Supplementary Table S3. Performance of the nine machine learning models in the external validation cohort of patients aged  $\geq 65$  years**

| Model               | AUC   | Threshold | Accuracy | Sensitivity | Specificity | Precision | F1 score |
|---------------------|-------|-----------|----------|-------------|-------------|-----------|----------|
| Logistic regression | 0.642 | 0.461     | 0.492    | 0.738       | 0.479       | 0.070     | 0.128    |
| SVM                 | 0.649 | 0.515     | 0.497    | 0.750       | 0.484       | 0.072     | 0.131    |
| GBM                 | 0.627 | 0.487     | 0.604    | 0.625       | 0.602       | 0.077     | 0.138    |
| Neural network      | 0.619 | 0.381     | 0.344    | 0.875       | 0.316       | 0.064     | 0.119    |
| KNN                 | 0.553 | 0.500     | 0.612    | 0.487       | 0.618       | 0.064     | 0.113    |
| XGBoost             | 0.633 | 0.500     | 0.726    | 0.550       | 0.736       | 0.100     | 0.169    |
| AdaBoost            | 0.627 | 0.750     | 0.803    | 0.400       | 0.825       | 0.108     | 0.171    |
| LightGBM            | 0.607 | 0.242     | 0.479    | 0.738       | 0.465       | 0.069     | 0.125    |
| CatBoost            | 0.652 | 0.636     | 0.832    | 0.400       | 0.855       | 0.129     | 0.195    |

Nine machine learning models were evaluated in the external validation cohort of patients aged  $\geq 65$  years. The classification threshold for each model represents the probability cutoff used to calculate threshold-dependent metrics. AUC is threshold-independent; accuracy, sensitivity, specificity, precision, and F1 score are threshold-dependent metrics.

**Abbreviations:** AUC, area under the receiver operating characteristic curve; F1, F1 score; GBM, gradient boosting machine; KNN, k-nearest neighbors; SVM, support vector machine; XGBoost, extreme gradient boosting; LightGBM, light gradient boosting machine.

**Supplementary Table S4. Performance of the nine machine learning models in the external validation cohort of patients aged <65 years**

| Model               | AUC   | Threshold | Accuracy | Sensitivity | Specificity | Precision | F1 score |
|---------------------|-------|-----------|----------|-------------|-------------|-----------|----------|
| Logistic regression | 0.766 | 0.324     | 0.496    | 0.944       | 0.478       | 0.066     | 0.124    |
| SVM                 | 0.771 | 0.527     | 0.680    | 0.833       | 0.674       | 0.091     | 0.164    |
| GBM                 | 0.756 | 0.372     | 0.594    | 0.889       | 0.583       | 0.077     | 0.142    |
| Neural network      | 0.735 | 0.584     | 0.646    | 0.833       | 0.639       | 0.083     | 0.151    |
| KNN                 | 0.572 | 0.500     | 0.638    | 0.500       | 0.643       | 0.052     | 0.094    |
| XGBoost             | 0.762 | 0.501     | 0.826    | 0.667       | 0.833       | 0.135     | 0.224    |
| AdaBoost            | 0.690 | 0.234     | 0.552    | 0.833       | 0.541       | 0.066     | 0.123    |
| LightGBM            | 0.646 | 0.958     | 0.644    | 0.667       | 0.643       | 0.068     | 0.124    |
| CatBoost            | 0.784 | 0.623     | 0.642    | 0.889       | 0.633       | 0.086     | 0.158    |

Nine machine learning models were evaluated in the external validation cohort of patients aged <65 years. The classification threshold for each model represents the probability cutoff used to calculate threshold-dependent metrics. AUC is threshold-independent; accuracy, sensitivity, specificity, precision, and F1 score are threshold-dependent metrics.

**Abbreviations:** AUC, area under the receiver operating characteristic curve; F1, F1 score; GBM, gradient boosting machine; KNN, k-nearest neighbors; SVM, support vector machine; XGBoost, extreme gradient boosting; LightGBM, light gradient boosting machine.
